# Supplementary material
Source: publisher figshare collection journal article supplement (https://gsapubs.figshare.com/ndownloader/files/23299583)
Supplement: Supplementary file 1 [file 23299583]

*Sediment coring*

A 327-cm-long continuous sediment core was taken from the depocenter (21.5 m) of Yanacocha in 2011 using a percussion coring system, and the top 23 cm were sampled in the field at 0.25-cm intervals. A core was also collected from the shallow basin of the lake for a basal radiocarbon age (Table DR1).

*Lake Sediment Geochronology*

The age model is based on  $^{210}\text{Pb}$  dating of the upper 10 cm of the core and radiocarbon ages (Table DR1) that were calibrated and converted to calendar and modeled ages (with present defined as A.D. 1950) using Oxcal version 4.2 and the Intcal13 dataset (Bronk Ramsey, 2008; Reimer et al., 2013). Ages were omitted if they were excluded by the OxCal depositional model as outliers.

*Sedimentology and Geochemistry*

The sediment core data are available for download from the National Climatic Data Center (<http://www.ncdc.noaa.gov/paleo/study/18495>). Sediment cores were analyzed using an ITRAX scanning X-Ray Fluorescence (XRF) at 1 mm spacing. The extruded sediments were measured using an Innov-X handheld XRF. Principal component 1 (PC1) analysis was applied to a subset of geochemical data that are typical of quartz monzonite bedrock: Al, Si, S, K, Ca, Ti, Mn, Fe, Zn, Rb, Sr and Zr. Total inorganic carbon (TIC) and total carbon (TC) values were measured by coulometry every 3 to 5 cm down core. Total carbon was measured by combusting samples at 1000°C using a UIC 5200 automated furnace, and TIC was measured by acidifying samples in 1.0 N  $\text{HClO}_4$  using a UIC 5240 acidification module; the carbon dioxide liberated in both cases was measured using a UIC Coulometrics<sup>TM</sup> carbon dioxide coulometer at Union College. Weight percentage total organic carbon (TOC) was calculated by subtracting TIC from TC ( $\text{TOC} = \text{TC} - \text{TIC}$ ) and converted to percent organic matter by multiplying by 1.72.

Weight percentage biogenic silica ( $\text{bSiO}_2$ ) was measured on centimeter-thick sections, taken every 10 to 20 cm down-core. A modified wet alkali sequential digestion method (DeMaster, 1979, 1981; Conley, 1998) was used on approximately 10 mg of freeze-dried sediment (Conley and Schelske, 2001). The clastic sediment component was calculated as the fraction remaining after subtracting organic matter and biogenic silica from the total dry sediment bulk density. However, biogenic silica concentrations are <1% throughout the record and are considered negligible. Clastic sediment was converted to flux ( $\text{g}/\text{cm}^2/\text{yr}$ ) by multiplying the clastic component of dry bulk density ( $\text{g}/\text{cm}^3$ ) by sedimentation rate ( $\text{cm}/\text{yr}$ ).

### <sup>10</sup>Be Exposure Ages

Samples for <sup>10</sup>Be exposure dating were collected from quartz monzonite erratics following previously described field protocols (e.g. Licciardi et al., 2009). Rock was chiseled from near the center of boulder top surfaces on stable parts of moraine crests. The tallest stable boulders (>1 m where possible) with glacial polish, smoothing, and/or negligible surface pitting were targeted to minimize issues with erosion and to reduce the potential for soil and snow cover. Geographic coordinates and altitudes of each boulder were obtained using a handheld GPS, and topographic measurements and strike and dip of rock surfaces were used to derive shielding corrections for each sample site.

Samples collected for <sup>10</sup>Be exposure dating were sawed to a measured uniform thickness (0.5–5.0 cm), and milled to a 710–355 µm size fraction at Union College. Beryllium was extracted from milled rock to produce purified BeO target material for accelerator mass spectrometry (AMS) analysis, following established geochemical procedures (Licciardi et al., 2009) in clean laboratory facilities at the University of New Hampshire. Crushed samples were sonicated in 6 N HCl for pre-cleaning, and quartz was then isolated by repeated etching in a 2% HF/1% HNO<sub>3</sub> solution (Kohl and Nishiizumi, 1992). <sup>9</sup>Be carrier (~0.2 mg) was added to the purified quartz samples before dissolution in concentrated HF. Beryllium was extracted from samples using ion-exchange chromatography, selective precipitation, and oxidation to BeO. All AMS measurements of <sup>10</sup>Be/<sup>9</sup>Be were obtained at the Lawrence Livermore National Laboratory Center for Accelerator Mass Spectrometry. See Table DR2 for additional measurement details.

Exposure ages were derived using the CRONUS-Earth (Cosmic-Ray prOduced NUclide Systematics on Earth) online <sup>10</sup>Be exposure age calculator version 2.2 (<http://hess.ess.washington.edu/math>; Balco et al., 2008). The largest limitation in exposure dating accuracy (but not precision) is commonly associated with knowledge of *in situ* cosmogenic nuclide production rates and their scaling with latitude, altitude and time. In this regard, our work benefits from recently published <sup>10</sup>Be production rate calibrations in the high Andes (Blard et al., 2013; Kelly et al., in press). Only modest latitudinal and altitudinal scaling of <sup>10</sup>Be production rates is required from these calibration sites to Huaguruncho, which minimizes potential uncertainties in scaled production rates. All <sup>10</sup>Be ages are calculated with the <sup>10</sup>Be production rate calibration developed at Quelccaya (Kelly et al., in press), as implemented on the CRONUS-Earth calculator with the time-invariant ‘St’ scaling scheme of Stone (2000) following Lal (1991) and zero erosion ( $3.85 \pm 0.09$  atoms g<sup>-1</sup> year<sup>-1</sup> in quartz at sea level high latitude). We note that a recent compilation of <sup>10</sup>Be production rate calibration data (Heyman, 2014) yields a global mean <sup>10</sup>Be production rate of  $3.94 \pm 0.20$  atoms g<sup>-1</sup> year<sup>-1</sup> in quartz at sea level high latitude, which results in exposure ages at Huaguruncho that are ~2% younger than those derived from the Quelccaya calibration data set alone. All <sup>10</sup>Be exposure ages are reported as years before present.

Snow cover attenuates cosmic rays and reduces surface production of  $^{10}\text{Be}$ , whereas erosion removes surface concentrations of cosmogenic nuclides, both of which lead to anomalously young apparent exposure ages (Gosse and Phillips, 2001). Snowpack data are not available for the Huaguruncho field area, but we observe no positive correlation between boulder height and exposure age, as would be expected if snow shielding was a problem. Consequently, snow cover issues are considered unlikely and the exposure ages are not corrected for snow shielding. Rock surface erosion rates are also not known in the field area, but the common presence of glacial polish on late Holocene moraine boulder surfaces indicates negligible erosion. Boulders on the early Holocene and older moraines did not contain polish, although sampled surfaces appeared glacially smoothed with minimal etching and no erosion corrections were applied.

The  $^{10}\text{Be}$  exposure age populations on individual moraine positions are reported as arithmetic means and associated analytical uncertainties (1 standard deviation), and do not include outliers (see below). We interpret the mean of boulder ages on a moraine to date the culmination of steady-state conditions and subsequent moraine abandonment; that is, the onset of glacial retreat. Importantly, the external uncertainties associated with the sea level high latitude  $^{10}\text{Be}$  production rate calibrated at Quelccaya (Kelly et al., in press) and the implemented scaling schemes (Lal, 1991; Stone, 2000) must be added to the analytical age uncertainties reported here when comparing the Huaguruncho  $^{10}\text{Be}$  chronologies with records dated by other independent methods.

Although the  $^{10}\text{Be}$  exposure age populations on individual moraine positions generally display high internal consistency, we consider 8 of the 48 ages reported here to be outliers in these populations (gray ages in Figure 2 of the main text; italicized ages in Table DR2). Seven of the outliers are anomalously old, most likely due to isotope inheritance from prior exposure. One outlier (DRPE13-45) is anomalously young, and is interpreted to indicate either post-glacial rockfall from the headwall above the moraine or post-depositional boulder rotation. All outliers are more than three standard deviations beyond the mean of the moraine age populations.

Table DR1. Radiocarbon ages measured on aquatic mosses.

| UCIAMS  | Core                         | Depth (cm) | Measured $^{14}\text{C}$ age | Measured error $\pm$ | Median calibrated age | Oxcal median modeled age (cal yr BP) | Oxcal 2 $\sigma$ modeled calibrated age (cal yr BP) |
|---------|------------------------------|------------|------------------------------|----------------------|-----------------------|--------------------------------------|-----------------------------------------------------|
| 101317  | Percussion core - deep basin | 12.9       | 165                          | 15                   | 190                   | 199                                  | 0-285                                               |
| 113101  | Percussion core - deep basin | 16.1       | 285                          | 15                   | 384                   | 314                                  | 295-428                                             |
| 113103  | Percussion core - deep basin | 22         | 1165                         | 20                   | 1093                  | 1088                                 | 1000-1177                                           |
| 101392  | Percussion core - deep basin | 40         | 2345                         | 15                   | 2351                  | 2350                                 | 2338-2360                                           |
| 146812  | Percussion core - deep basin | 62         | 3950                         | 20                   | 4420                  | 4419                                 | 4296-4514                                           |
| 146813  | Percussion core - deep basin | 81         | 5390                         | 20                   | 6228                  | 6247                                 | 6183-6280                                           |
| 101318  | Percussion core - deep basin | 85         | 5525                         | 15                   | 6306                  | 6303                                 | 6284-6391                                           |
| 101319  | Percussion core - deep basin | 124.1      | 6235                         | 20                   | 7186                  | 7190                                 | 7028-7251                                           |
| 101394  | Percussion core - deep basin | 154.1      | 7580                         | 20                   | 8392                  | 8392                                 | 8369-8414                                           |
| 101320  | Percussion core - deep basin | 192        | 9865                         | 20                   | 11250                 | 11248                                | 11218-11292                                         |
| 146940  | Percussion core - deep basin | 266        | 10125                        | 30                   | 11770                 | 11834                                | 11645-12014                                         |
| 146941  | Percussion core - deep basin | 278        | 10605                        | 40                   | 12600                 | 12448                                | 12095-12522                                         |
| 101322  | Percussion core - deep basin | 283        | 10380                        | 25                   | 12253                 | 12485                                | 12111-12525                                         |
| 113102* | Percussion core - deep basin | 19.3       | 1245                         | 15                   |                       | *omitted from age model              |                                                     |
| 101393* | Percussion core - deep basin | 94.1       | 4685                         | 20                   |                       | *omitted from age model              |                                                     |
| 101395* | Percussion core - deep basin | 221        | 11100                        | 25                   |                       | *omitted from age model              |                                                     |
| 101321* | Percussion core - deep basin | 251        | 8070                         | 20                   |                       | *omitted from age model              |                                                     |
| UCIAMS  | Core                         | Depth (cm) | Measured $^{14}\text{C}$ age | Measured error $\pm$ | Median calibrated age | 2 $\sigma$ age range                 |                                                     |
| 99895   | Basal age - shallow basin    |            | 11880                        | 160                  | 13733                 | 13409-14120                          |                                                     |

Table DR2. Beryllium data and ages for Nevado Huaguruncho samples.

| Sample ID                                                         | Latitude<br>(°S) | Longitude<br>(°W) | Elevation <sup>a</sup><br>(m.a.s.l.) | Quartz<br>(g) | Be carrier <sup>b</sup><br>(mg) | Thickness <sup>c</sup><br>(cm) | Shielding <sup>d</sup><br>factor | <sup>10</sup> Be/ <sup>9</sup> Be <sup>e,f</sup> | ±<br>(1σ) | [Be-10] <sup>b,f</sup><br>(atoms g <sup>-1</sup> ) | ±<br>(atoms g <sup>-1</sup> ) | Age <sup>g,h</sup><br>(yr BP) | ±<br>(yr BP) |
|-------------------------------------------------------------------|------------------|-------------------|--------------------------------------|---------------|---------------------------------|--------------------------------|----------------------------------|--------------------------------------------------|-----------|----------------------------------------------------|-------------------------------|-------------------------------|--------------|
| <b>Moraine enclosing Laguna Yanacocha</b>                         |                  |                   |                                      |               |                                 |                                |                                  |                                                  |           |                                                    |                               |                               |              |
| DRPE-11-15                                                        | 10.55603         | 75.93057          | 4474                                 | 31.8581       | 0.2184                          | 3.10                           | 0.9890                           | 1.092E-12                                        | 1.588E-14 | 5.002E+05                                          | 7.274E+03                     | 14460                         | 210          |
| DRPE-11-12                                                        | 10.55617         | 75.92968          | 4450                                 | 40.0050       | 0.2070                          | 3.50                           | 0.9704                           | 1.364E-12                                        | 2.419E-14 | 4.715E+05                                          | 8.364E+03                     | 14070                         | 250          |
| DRPE-11-13                                                        | 10.55617         | 75.93057          | 4474                                 | 30.1584       | 0.2065                          | 3.10                           | 0.9890                           | 1.040E-12                                        | 1.305E-14 | 4.760E+05                                          | 5.974E+03                     | 13750                         | 170          |
|                                                                   |                  |                   |                                      |               |                                 |                                |                                  |                                                  |           |                                                    | <i>ave ± st dev</i>           | 14090                         | 360          |
| <b>Moraine trending south from Laguna Yanacocha</b>               |                  |                   |                                      |               |                                 |                                |                                  |                                                  |           |                                                    |                               |                               |              |
| DRPE-13-01                                                        | 10.56264         | 75.92941          | 4420                                 | 30.2706       | 0.2118                          | 2.50                           | 0.9803                           | 9.118E-13                                        | 1.748E-14 | 4.262E+05                                          | 8.170E+03                     | 12660                         | 240          |
| DRPE-13-03                                                        | 10.56325         | 75.92910          | 4445                                 | 30.3498       | 0.2114                          | 2.00                           | 0.9803                           | 8.432E-13                                        | 1.663E-14 | 3.924E+05                                          | 7.741E+03                     | 11470                         | 230          |
| DRPE-13-04                                                        | 10.56444         | 75.92872          | 4483                                 | 30.0288       | 0.1871                          | 2.50                           | 0.9693                           | 8.961E-13                                        | 1.324E-14 | 3.731E+05                                          | 5.514E+03                     | 10890                         | 160          |
| DRPE-13-02                                                        | 10.56302         | 75.92920          | 4438                                 | 30.0414       | 0.1865                          | 2.50                           | 0.9421                           | 8.399E-13                                        | 1.137E-14 | 3.484E+05                                          | 4.718E+03                     | 10670                         | 150          |
|                                                                   |                  |                   |                                      |               |                                 |                                |                                  |                                                  |           |                                                    | <i>ave ± st dev</i>           | 11010                         | 410          |
| <b>Moraine belt west of Laguna Jaico - distal</b>                 |                  |                   |                                      |               |                                 |                                |                                  |                                                  |           |                                                    |                               |                               |              |
| DRPE-13-29                                                        | 10.55418         | 75.92960          | 4390                                 | 30.0835       | 0.1847                          | 1.50                           | 0.9602                           | 1.016E-12                                        | 1.270E-14 | 4.170E+05                                          | 5.213E+03                     | 12700                         | 160          |
| DRPE-13-27                                                        | 10.55370         | 75.92819          | 4332                                 | 30.1254       | 0.2080                          | 2.00                           | 0.9584                           | 8.152E-13                                        | 8.166E-15 | 3.761E+05                                          | 3.767E+03                     | 11830                         | 120          |
| DRPE-13-28                                                        | 10.55382         | 75.92863          | 4348                                 | 30.0189       | 0.1976                          | 1.50                           | 0.9584                           | 8.634E-13                                        | 1.044E-14 | 3.799E+05                                          | 4.593E+03                     | 11810                         | 140          |
| DRPE-11-28                                                        | 10.55060         | 75.92783          | 4315                                 | 30.0235       | 0.2052                          | 4.00                           | 0.9418                           | 7.792E-13                                        | 9.633E-15 | 3.559E+05                                          | 4.400E+03                     | 11660                         | 150          |
| DRPE-11-26                                                        | 10.55065         | 75.92778          | 4313                                 | 30.0424       | 0.2060                          | 4.00                           | 0.9489                           | 7.643E-13                                        | 1.293E-14 | 3.503E+05                                          | 5.926E+03                     | 11400                         | 190          |
| DRPE-11-29                                                        | 10.55058         | 75.92783          | 4315                                 | 30.2031       | 0.2061                          | 4.00                           | 0.9466                           | 7.602E-13                                        | 1.401E-14 | 3.467E+05                                          | 6.388E+03                     | 11300                         | 210          |
|                                                                   |                  |                   |                                      |               |                                 |                                |                                  |                                                  |           |                                                    | <i>ave ± st dev</i>           | 11600                         | 240          |
| <b>Moraine belt west of Laguna Jaico - intermediate</b>           |                  |                   |                                      |               |                                 |                                |                                  |                                                  |           |                                                    |                               |                               |              |
| DRPE-11-22                                                        | 10.55000         | 75.92910          | 4367                                 | 30.1713       | 0.2056                          | 4.00                           | 0.9244                           | 1.012E-12                                        | 1.481E-14 | 4.608E+05                                          | 6.743E+03                     | 15030                         | 220          |
| DRPE-11-20                                                        | 10.55362         | 75.93007          | 4396                                 | 40.0650       | 0.2085                          | 4.00                           | 0.9627                           | 1.111E-12                                        | 1.793E-14 | 3.863E+05                                          | 6.234E+03                     | 11940                         | 190          |
| DRPE-11-23                                                        | 10.55028         | 75.92862          | 4350                                 | 29.9534       | 0.2065                          | 4.00                           | 0.9244                           | 7.653E-13                                        | 9.487E-15 | 3.526E+05                                          | 4.372E+03                     | 11580                         | 140          |
| DRPE-11-16                                                        | 10.55350         | 75.92993          | 4386                                 | 40.0483       | 0.2096                          | 4.00                           | 0.9493                           | 1.039E-12                                        | 2.276E-14 | 3.632E+05                                          | 7.962E+03                     | 11430                         | 250          |
| DRPE-11-17                                                        | 10.55358         | 75.93002          | 4391                                 | 40.0849       | 0.2140                          | 3.00                           | 0.9608                           | 1.029E-12                                        | 1.333E-14 | 3.673E+05                                          | 4.756E+03                     | 11310                         | 150          |
| DRPE-11-24                                                        | 10.55070         | 75.92788          | 4322                                 | 30.5683       | 0.2060                          | 4.00                           | 0.9489                           | 7.726E-13                                        | 1.245E-14 | 3.480E+05                                          | 5.608E+03                     | 11280                         | 180          |
| DRPE-11-21                                                        | 10.54993         | 75.92925          | 4369                                 | 30.1632       | 0.2051                          | 4.00                           | 0.9241                           | 7.579E-13                                        | 1.110E-14 | 3.444E+05                                          | 5.044E+03                     | 11220                         | 170          |
|                                                                   |                  |                   |                                      |               |                                 |                                |                                  |                                                  |           |                                                    | <i>ave ± st dev</i>           | 11460                         | 270          |
| <b>Moraine belt west of Laguna Jaico - proximal</b>               |                  |                   |                                      |               |                                 |                                |                                  |                                                  |           |                                                    |                               |                               |              |
| DRPE-13-25                                                        | 10.55288         | 75.93035          | 4363                                 | 30.1484       | 0.2080                          | 1.00                           | 0.9392                           | 1.350E-11                                        | 7.281E-14 | 6.223E+06                                          | 3.356E+04                     | 204810                        | 1160         |
| DRPE-13-24                                                        | 10.55276         | 75.93024          | 4358                                 | 29.9529       | 0.1977                          | 1.50                           | 0.9370                           | 7.745E-13                                        | 1.630E-14 | 3.417E+05                                          | 7.191E+03                     | 10810                         | 230          |
| DRPE-13-23                                                        | 10.55270         | 75.93027          | 4356                                 | 30.6946       | 0.2085                          | 1.50                           | 0.9392                           | 7.509E-13                                        | 9.842E-15 | 3.408E+05                                          | 4.467E+03                     | 10770                         | 140          |
| DRPE-13-26                                                        | 10.55312         | 75.93042          | 4392                                 | 30.1762       | 0.1996                          | 1.00                           | 0.9594                           | 7.680E-13                                        | 8.429E-15 | 3.395E+05                                          | 3.725E+03                     | 10290                         | 110          |
|                                                                   |                  |                   |                                      |               |                                 |                                |                                  |                                                  |           |                                                    | <i>ave ± st dev</i>           | 10620                         | 290          |
| <b>Moraine downvalley of Laguna Jaico</b>                         |                  |                   |                                      |               |                                 |                                |                                  |                                                  |           |                                                    |                               |                               |              |
| DRPE-11-41                                                        | 10.55647         | 75.91500          | 4333                                 | 39.3019       | 0.2070                          | 4.50                           | 0.9839                           | 1.031E-12                                        | 2.902E-14 | 3.627E+05                                          | 1.021E+04                     | 11330                         | 320          |
| DRPE-11-42                                                        | 10.55663         | 75.91422          | 4337                                 | 40.7623       | 0.2170                          | 4.00                           | 0.9942                           | 1.012E-12                                        | 2.979E-14 | 3.599E+05                                          | 1.060E+04                     | 11070                         | 330          |
| DRPE-11-40                                                        | 10.55653         | 75.91513          | 4323                                 | 39.8457       | 0.4250                          | 4.00                           | 0.9881                           | 4.802E-13                                        | 9.103E-15 | 3.422E+05                                          | 6.488E+03                     | 10650                         | 200          |
|                                                                   |                  |                   |                                      |               |                                 |                                |                                  |                                                  |           |                                                    | <i>ave ± st dev</i>           | 11020                         | 340          |
| <b>Moraine belt near eastern shore of Laguna Jaico</b>            |                  |                   |                                      |               |                                 |                                |                                  |                                                  |           |                                                    |                               |                               |              |
| DRPE-13-30                                                        | 10.55205         | 75.92062          | 4320                                 | 29.9875       | 0.1996                          | 1.50                           | 0.9406                           | 9.588E-13                                        | 2.096E-14 | 4.264E+05                                          | 9.320E+03                     | 13680                         | 300          |
| DRPE-13-32                                                        | 10.55217         | 75.92097          | 4300                                 | 30.2133       | 0.2070                          | 2.00                           | 0.9406                           | 7.208E-13                                        | 8.797E-15 | 3.299E+05                                          | 4.027E+03                     | 10720                         | 130          |
| DRPE-13-31                                                        | 10.55211         | 75.92088          | 4306                                 | 30.1240       | 0.1970                          | 1.00                           | 0.9402                           | 7.263E-13                                        | 1.134E-14 | 3.174E+05                                          | 4.955E+03                     | 10200                         | 160          |
|                                                                   |                  |                   |                                      |               |                                 |                                |                                  |                                                  |           |                                                    | <i>ave ± st dev</i>           | 10460                         | 370          |
| <b>Moraine ridge north of Laguna Jaico - distal</b>               |                  |                   |                                      |               |                                 |                                |                                  |                                                  |           |                                                    |                               |                               |              |
| DRPE-13-42                                                        | 10.54938         | 75.92271          | 4302                                 | 40.0678       | 0.1972                          | 2.00                           | 0.8886                           | 9.407E-13                                        | 1.820E-14 | 3.094E+05                                          | 5.987E+03                     | 10620                         | 210          |
| DRPE-13-41                                                        | 10.54928         | 75.92254          | 4329                                 | 40.0038       | 0.1972                          | 3.00                           | 0.9145                           | 9.472E-13                                        | 1.836E-14 | 3.121E+05                                          | 6.048E+03                     | 10370                         | 200          |
| DRPE-13-44                                                        | 10.55002         | 75.92434          | 4297                                 | 40.2691       | 0.1970                          | 2.50                           | 0.9290                           | 9.398E-13                                        | 1.574E-14 | 3.073E+05                                          | 5.147E+03                     | 10160                         | 170          |
| DRPE-13-43                                                        | 10.54945         | 75.92277          | 4305                                 | 39.9668       | 0.1974                          | 1.50                           | 0.9575                           | 9.638E-13                                        | 2.379E-14 | 3.181E+05                                          | 7.853E+03                     | 10090                         | 250          |
| DRPE-13-45                                                        | 10.54998         | 75.92432          | 4305                                 | 39.9502       | 0.1978                          | 2.00                           | 0.9637                           | 8.825E-13                                        | 1.871E-14 | 2.920E+05                                          | 6.192E+03                     | 9240                          | 200          |
|                                                                   |                  |                   |                                      |               |                                 |                                |                                  |                                                  |           |                                                    | <i>ave ± st dev</i>           | 10310                         | 240          |
| <b>Moraine ridge north of Laguna Jaico - intermediate</b>         |                  |                   |                                      |               |                                 |                                |                                  |                                                  |           |                                                    |                               |                               |              |
| DRPE-13-34                                                        | 10.54901         | 75.92307          | 4320                                 | 40.0371       | 0.1975                          | 1.00                           | 0.9355                           | 7.796E-14                                        | 1.702E-15 | 2.570E+04                                          | 5.612E+02                     | 820                           | 20           |
| DRPE-13-35                                                        | 10.54953         | 75.92392          | 4304                                 | 40.0330       | 0.1976                          | 0.75                           | 0.9302                           | 3.137E-14                                        | 1.476E-15 | 1.035E+04                                          | 4.868E+02                     | 340                           | 20           |
| DRPE-13-33                                                        | 10.54833         | 75.92157          | 4384                                 | 40.0792       | 0.1979                          | 2.50                           | 0.9537                           | 2.951E-14                                        | 1.066E-15 | 9.741E+03                                          | 3.517E+02                     | 300                           | 10           |
| DRPE-13-36                                                        | 10.54975         | 75.92434          | 4276                                 | 40.0321       | 0.1980                          | 1.00                           | 0.8738                           | 2.580E-14                                        | 8.977E-16 | 8.531E+03                                          | 2.968E+02                     | 300                           | 10           |
|                                                                   |                  |                   |                                      |               |                                 |                                |                                  |                                                  |           |                                                    | <i>ave ± st dev</i>           | 310                           | 20           |
| <b>Moraine ridge north of Laguna Jaico - proximal lower track</b> |                  |                   |                                      |               |                                 |                                |                                  |                                                  |           |                                                    |                               |                               |              |
| DRPE-11-37                                                        | 10.54740         | 75.92247          | 4388                                 | 40.0418       | 0.2080                          | 5.00                           | 0.9589                           | 2.970E-13                                        | 5.549E-15 | 1.031E+05                                          | 1.926E+03                     | 3230                          | 60           |
| DRPE-11-35                                                        | 10.54732         | 75.92205          | 4397                                 | 40.0882       | 0.2056                          | 4.00                           | 0.8979                           | 3.575E-14                                        | 9.192E-16 | 1.225E+04                                          | 3.151E+02                     | 400                           | 10           |
| DRPE-11-38                                                        | 10.54743         | 75.92313          | 4374                                 | 39.9807       | 0.2077                          | 4.50                           | 0.9596                           | 3.653E-14                                        | 9.827E-16 | 1.268E+04                                          | 3.411E+02                     | 400                           | 10           |
| DRPE-11-36                                                        | 10.54742         | 75.92220          | 4394                                 | 40.1087       | 0.2058                          | 4.00                           | 0.9161                           | 3.189E-14                                        | 8.441E-16 | 1.094E+04                                          | 2.895E+02                     | 350                           | 10           |
|                                                                   |                  |                   |                                      |               |                                 |                                |                                  |                                                  |           |                                                    | <i>ave ± st dev</i>           | 380                           | 30           |
| <b>Moraine ridge north of Laguna Jaico - proximal upper track</b> |                  |                   |                                      |               |                                 |                                |                                  |                                                  |           |                                                    |                               |                               |              |
| DRPE-13-37                                                        | 10.54717         | 75.92274          | 4379                                 | 13.1968       | 0.1884                          | 4.00                           | 0.9330                           | 1.353E-14                                        | 6.238E-16 | 1.291E+04                                          | 5.951E+02                     | 410                           | 20           |
| DRPE-13-38                                                        | 10.54736         | 75.92349          | 4373                                 | 39.9951       | 0.1971                          | 4.50                           | 0.9549                           | 3.878E-14                                        | 1.172E-15 | 1.277E+04                                          | 3.859E+02                     | 400                           | 10           |
| DRPE-11-39                                                        | 10.54743         | 75.92370          | 4367                                 | 40.1592       | 0.2071                          | 4.00                           | 0.9596                           | 3.329E-14                                        | 9.188E-16 | 1.148E+04                                          | 3.167E+02                     | 360                           | 10           |
| DRPE-13-40                                                        | 10.54817         | 75.92504          | 4358                                 | 40.1142       | 0.1976                          | 0.50                           | 0.9620                           | 2.993E-14                                        | 9.268E-16 | 9.855E+03                                          | 3.051E+02                     | 300                           | 10           |
| DRPE-13-39                                                        | 10.54784         | 75.92461          | 4370                                 | 39.9797       | 0.1973                          | 2.50                           | 0.9599                           | 2.272E-14                                        | 1.242E-15 | 7.494E+03                                          | 4.095E+02                     | 230                           | 10           |
|                                                                   |                  |                   |                                      |               |                                 |                                |                                  |                                                  |           |                                                    | <i>ave ± st dev</i>           | 340                           | 80           |

<sup>a</sup> Age calculations are performed with an atmosphere approximation derived from elevation using the standard atmosphere equation with geographically variable surface pressure and 1000 mbar temperature, as implemented on the CRONUS-Earth calculator (Balco et al., 2008).

<sup>b</sup> Eight samples (DRPE11-12,15,16,17,20,40,41,42) were spiked with <sup>9</sup>Be carrier prepared from BeSO<sub>4</sub> at the Lamont-Doherty Earth Observatory (LDEO); analysis of two BeSO<sub>4</sub> blanks processed in parallel with these samples yielded a mean <sup>10</sup>Be/<sup>9</sup>Be ratio of  $7.1 \times 10^{-15}$ . All other samples were spiked with low-level <sup>9</sup>Be LDEO Carrier 5.1 prepared from shielded beryl; analyses of 12 blanks processed in parallel with these latter samples yielded a mean <sup>10</sup>Be/<sup>9</sup>Be of  $6.4 \times 10^{-16}$  and ranged as low as  $2.4 \times 10^{-16}$ .

<sup>c</sup> Sample thickness corrections employ a measured rock density of 2.6 g cm<sup>-3</sup>.

<sup>d</sup> Topographic shielding corrections were derived from field measurements using the CRONUS-Earth geometric shielding calculator

([http://hess.ess.washington.edu/math/general/skyline\\_input.php](http://hess.ess.washington.edu/math/general/skyline_input.php)).

<sup>e</sup> Isotopic ratios are normalized to <sup>10</sup>Be/<sup>9</sup>Be standard 07KNSTD3110 (Nishiizumi et al., 2007) and reported with 1σ analytical error.

<sup>f</sup> All <sup>10</sup>Be/<sup>9</sup>Be ratios and <sup>10</sup>Be concentrations reported here are corrected for background using mean values of blanks processed in parallel with samples.

<sup>g</sup> All <sup>10</sup>Be exposure ages are calculated with the time-invariant ‘St’ scaling scheme of Stone (2000) following Lal (1991).

<sup>h</sup> Individual boulder ages are reported with 1σ uncertainty reflecting analytical error only and rounded to the nearest 10 years. Age populations on each moraine are ordered from oldest to youngest; means and standard deviations do not include italicized ages, which are considered outliers.

## REFERENCES

- Balco, G., Stone, J. O., Lifton, N. A., and Dunai, T. J., 2008, A complete and easily accessible means of calculating surface exposure ages or erosion rates from <sup>10</sup>Be and <sup>26</sup>Al measurements: *Quaternary Geochronology*, v. 3, no. 3, p. 174-195.
- Blard, P. H., Braucher, R., Lavé, J., and Bourlès, D., 2013, Cosmogenic <sup>10</sup>Be production rate calibrated against <sup>3</sup>He in the high Tropical Andes (3800–4900 m, 20–22° S): *Earth and Planetary Science Letters*, v. 382, no. 0, p. 140-149.
- Bronk Ramsey, C., 2008, Deposition models for chronological records: *Quaternary Science Reviews*, v. 27, p. 42-60.
- Conley, D. J., 1998, An interlaboratory comparison for the measurement of biogenic silica in sediments: *Marine Chemistry*, v. 63, p. 39-48.
- Conley, D. J., and Schelske, C. L., 2001, Biogenic Silica, in Smol, J. P., Birks, H. J., and Last, W. M., eds., *Tracking environmental changes using lake sediments. Terrestrial, algal, and siliceous indicators*, Volume 3, Springer.

- DeMaster, D. J., 1979, The marine budgets of silica and  $^{32}\text{Si}$  [Ph.D. dissertation]: Yale University, New Haven.
- , 1981, The supply and accumulation of silica in the marine environment: *Geochimica et Cosmochimica Acta*, v. 45, p. 1715-1732.
- Gosse, J. C., and Phillips, F. M., 2001, Terrestrial in situ cosmogenic nuclides: theory and application: *Quaternary Science Reviews*, v. 20, p. 1475-1560.
- Heyman, J., 2014, Paleoglaciation of the Tibetan Plateau and surrounding mountains based on exposure ages and ELA depression estimates: *Quaternary Science Reviews*, v. 91, no. 0, p. 30-41.
- Kelly, M. A., Lowell, T. V., Applegate, P. J., Phillips, F. M., Schaefer, J. M., Smith, C. A., Kim, H., Leonard, K. C., and Hudson, A. M., in press, A locally calibrated, late glacial  $^{10}\text{Be}$  production rate from a low-latitude, high-altitude site in the Peruvian Andes: *Quaternary Geochronology*.
- Kohl, C. P., and Nishiizumi, K., 1992, Chemical isolation of quartz for measurement of in-situ - produced cosmogenic nuclides: *Geochimica et Cosmochimica Acta*, v. 56, no. 9, p. 3583-3587.
- Lal, D., 1991, Cosmic ray labeling of erosion surfaces: in situ nuclide production rates and erosion models: *Earth and Planetary Science Letters*, v. 104, no. 2-4, p. 424.
- Licciardi, J. M., Schaefer, J. M., Taggart, J. R., and Lund, D. C., 2009, Holocene Glacier Fluctuations in the Peruvian Andes Indicate Northern Climate Linkages: *Science*, v. 325, no. 5948, p. 1677-1679.
- Nishiizumi, K., Imamura, M., Caffee, M. W., Southon, J. R., Finkel, R. C., and McAninch, J., 2007, Absolute calibration of  $^{10}\text{Be}$  AMS standards: *Nuclear Instruments and Methods in Physics Research Section B: Beam Interactions with Materials and Atoms*, v. 258, no. 2, p. 403-413.
- Reimer, P., Bard, E., Bayliss, A., Beck, J., Blackwell, P., Bronk Ramsey, C., Buck, C., Cheng, H., Edwards, R., Friedrich, M., Grootes, P., Guilderson, T., Haflidason, H., Hajdas, I., Hatte, C., Heaton, T., Hoffmann, D., Hogg, A., Hughen, K., Kaiser, K., Kromer, B., Manning, S., Niu, M., Reimer, R., Richards, D., Scott, E., Southon, J., Staff, R., Turney, C., and van der Plicht, J., 2013, IntCal13 and Marine13 Radiocarbon Age Calibration Curves 0–50,000 Years cal BP: *Radiocarbon*, v. 55, no. 4, p. 1869-1887.
- Stone, J. O., 2000, Air pressure and cosmogenic isotope production: *Journal of Geophysical Research*, v. 105, p. 753-723, 759.
